# Supplementary material for: LSD1-ERRα complex requires NRF1 to positively regulate transcription and cell invasion
Source: PubMed Central journal article supplement (PMC6030097; doi:10.1038/s41598-018-27676-8), 2018-07-03
Supplement: 41598_2018_27676_MOESM1_ESM.pdf [file 41598_2018_27676_MOESM1_ESM.pdf]

**Supplementary File for**

LSD1-ERR $\alpha$  complex requires NRF1 to positively regulate transcription and cell invasion

Ling Zhang, Julie Carnesecchi, Catherine Cerutti, Violaine Tribollet, Christelle Forcet, Séverine Périan, Jiemin Wong, and Jean-Marc Vanacker

Contains Supplementary Figures S1, S2, S3 and Supplementary Table S1.

**Supplementary Figure S1.** Additional bio-informatics data.

**a.** Same as Fig.1b using the displaying the percent of sequences displaying at least 85% similarity to the indicated NRF1 matrix. Except where indicated, significance is calculated relative to "all TSS" with \*\*\*:  $p < 0.005$ , ns: nonsignificant.

**b.** Identification of the best (according to % score) putative NRF1 response elements (NRFRE) in the promoters (-150; +50 relative to TSS) of the ten genes of interest used in this study. Sequence, position on chromosome and relative to TSS is indicated.

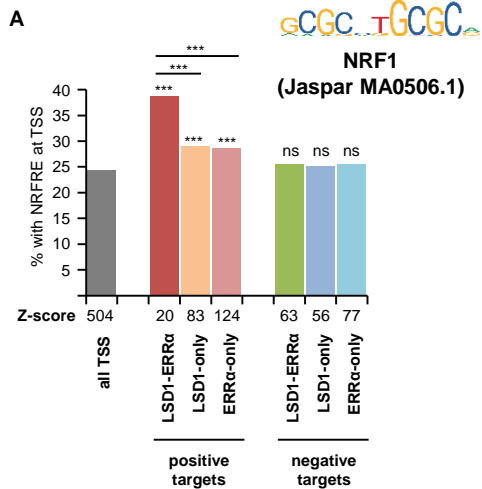

**B**

| Gene ID  | Chr. | NRFRE first nucleotide position |             | strand | % score | NRFRE sequence |
|----------|------|---------------------------------|-------------|--------|---------|----------------|
|          |      | on chromosome                   | rel. to TSS |        |         |                |
| ONECUT2  | 18   | 55102819                        | -98         | +      | 91.8    | CCGCACGCGCA    |
| ZNF768   | 16   | 30535412                        | -42         | +      | 84.6    | GCCCAGGCCCC    |
| GRWD1    | 19   | 48949286                        | 37          | -      | 88.5    | ACACGTGCGCC    |
| RPIA     | 2    | 88991018                        | -144        | +      | 87.2    | GCGATTGCGCA    |
| RSAD1    | 17   | 48556174                        | 13          | +      | 92.2    | CCGGCTGCGCA    |
| ANKRD13B | 17   | 27916641                        | -146        | +      | 90      | CCCCCTGCGCG    |
| LEF1     | 4    | 109002670                       | -70         | +      | 87.1    | GCAGAGGCGCA    |
| TMEM198  | 2    | 220408794                       | 32          | -      | 87.8    | GAGCCCGCCCG    |
| BSN      | 3    | 49591895                        | -17         | +      | 99.6    | GCGCATGCGCA    |
| OXNAD1   | 3    | 16306683                        | -13         | -      | 87.8    | GCGCGGGCGAG    |

**Supplementary Figure S2.** LSD1 requires both NRF1 and  $ERR\alpha$  to activate common target genes. Same as Fig. 4b, examining the expression of the indicated target genes.

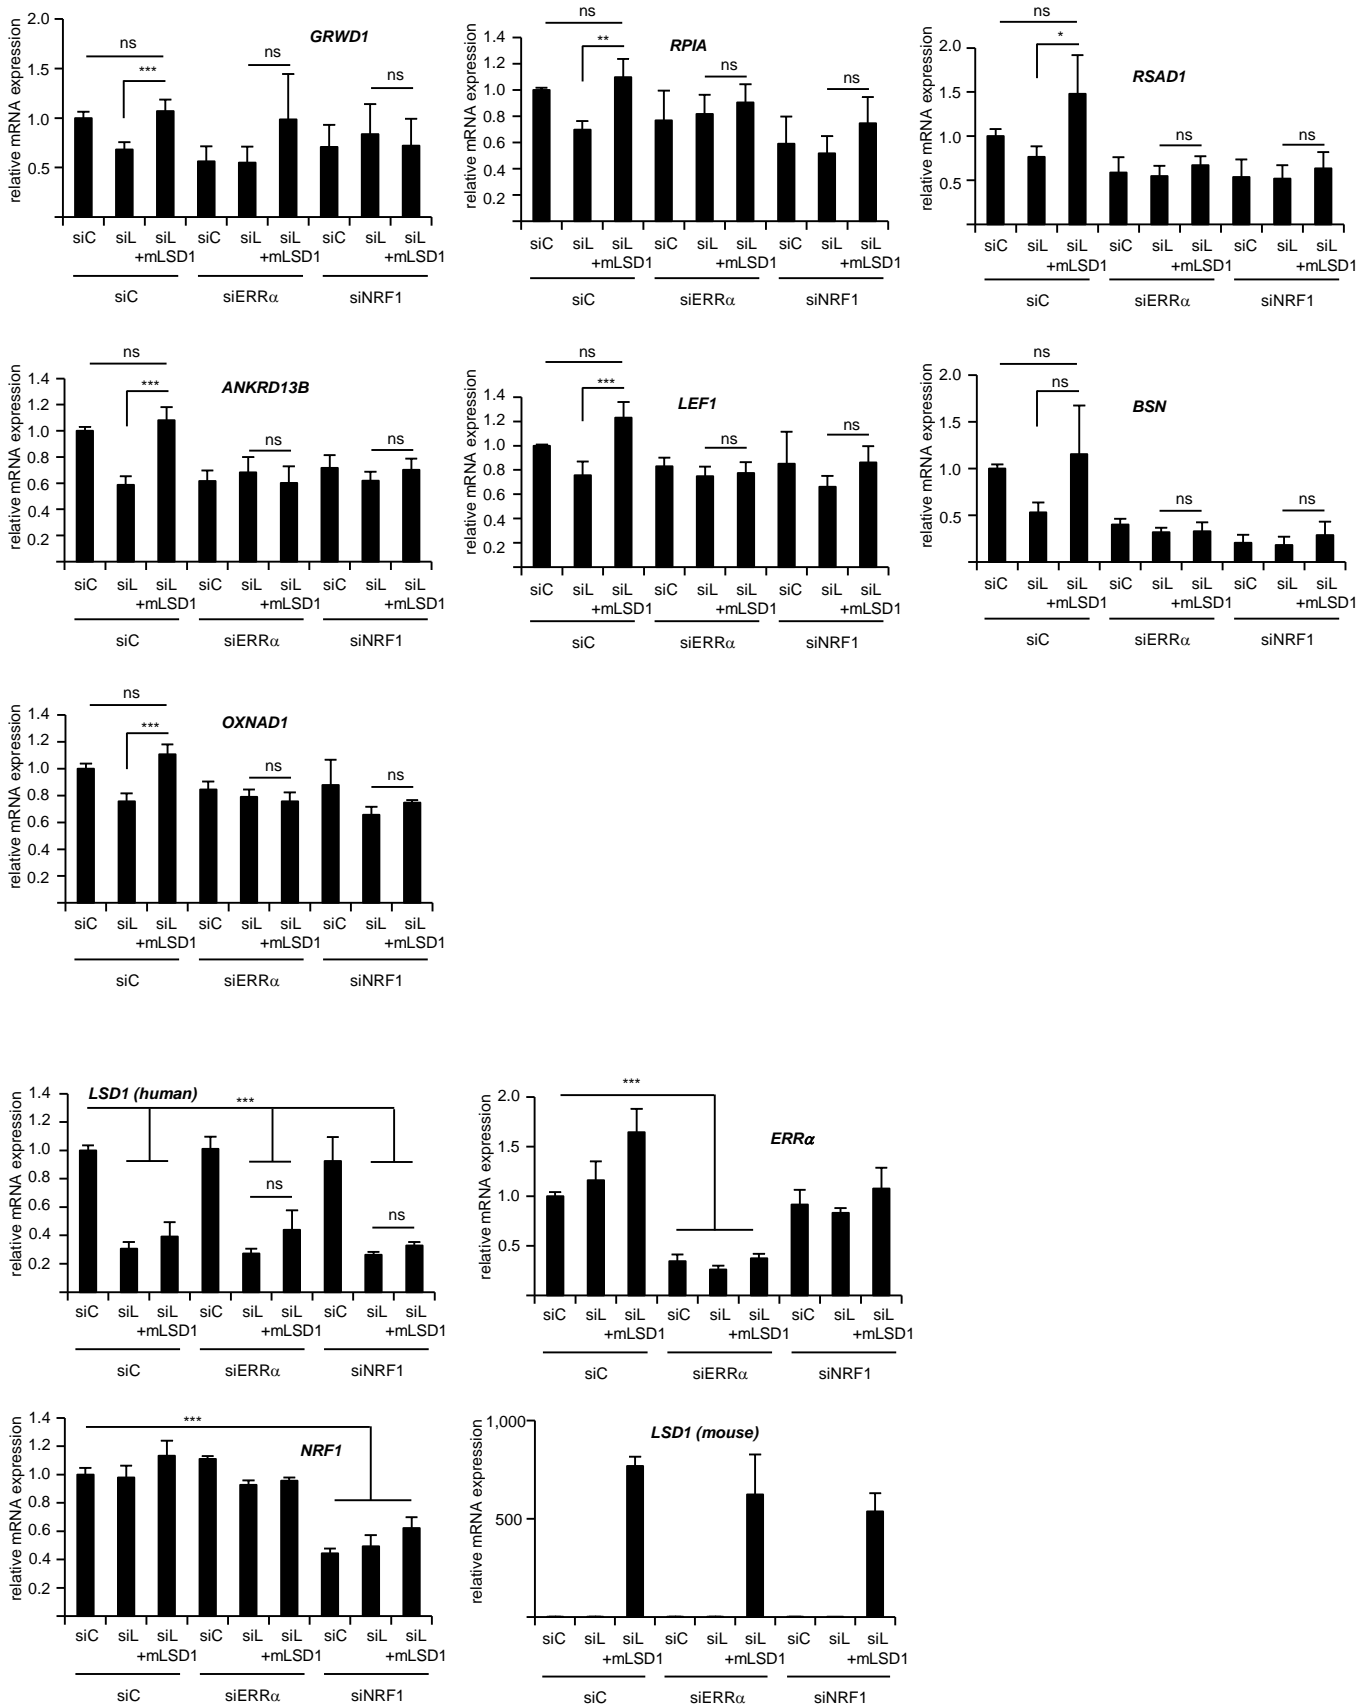

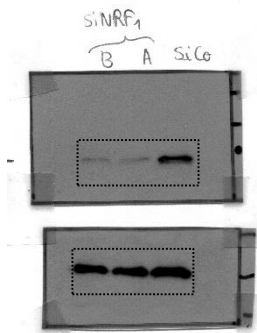

**For Fig. 2A.**  
Note that the blots were left-right inverted in Fig. 2A.

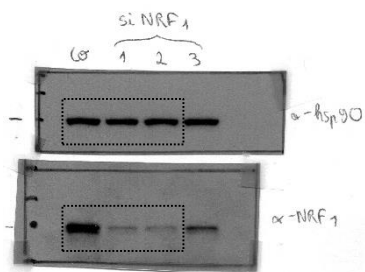

**For Fig. 5B.**  
NRF1 and hsp90 parts

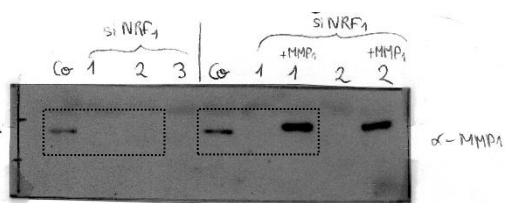

**For Fig. 5B and 5E**  
MMP1 parts

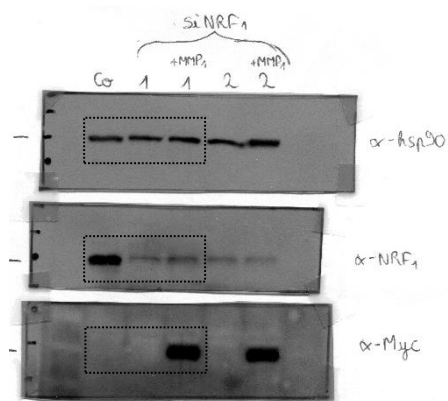

**For Fig. 5E**  
Myc, NRF1 and Hsp90 parts

## Supplementary Table S1: Oligonucleotides and siRNAs used in this study

### Oligonucleotides for expression studies

|                       |                      |                        |
|-----------------------|----------------------|------------------------|
| 36b4                  | GTCACTGTGCCAGCCAGAA  | TCAATGGTGCCCCTGGAGAT   |
| KDM1A (LSD1)<br>human | ACCACAACAGACCCAGAAGG | CTCGGTGGACAAGCACAGTA   |
| ESRRA                 | CAAGCGCCTCTGCCTGGTCT | ACTCGATGCTCCCCTGGATG   |
| NRF1                  | GCACCTTTGGAGAATGTGGT | AATTCCGTCGATGGTGAGAG   |
| ONECUT2               | AAATCTGGCAGGGAGACCTT | GGTTCCTTGCTCTTTGCGTTT  |
| ZNF768                | GGGTACCTCAGAGGCAACAT | GGGTTCAAACCTCTGGGCTTT  |
| GRWD1                 | TGGTCACCGACTGAGAACAC | GCTCCAGCTGATGACATTGA   |
| RPIA                  | TAGTCGCTTCATCGTGATCG | GATTCCCTTGTGCCACTGAT   |
| RSAD1                 | CGCAGCTGAGATGTACCAGA | AACGCCAAGGTAAGTACCAC   |
| ANKRD13B              | GGCAAGGTCAAAGGCTGTAA | GTGATCAGGGTCCCATTTTG   |
| LEF1                  | TGGAAAACGAAGCTCATTCC | GGGTTGGCAGTGATTGTCTT   |
| TMEM198               | GTGCTGTTTGTGGAGTCG   | TCTCGGTAGCAGAGGAGGAA   |
| BSN                   | CCAGCCAAACTTCAACACCT | AGCCCTCTGCATCTGACAGT   |
| OXNAD1                | CAGCAGCTAAGGTGTGTGGA | AACCCACCAACCACAGAGAC   |
| ABCF1                 | CAGTGCCAACCAGTGATGAG | GGCAGGCTTAGGAGGATGTT   |
| SNX12                 | CCGAGGAGATGAAGGGATCT | TGTAGGCAGCGTTCATTCTG   |
| ELK3                  | CCAAAGGCTTGGAAATCTCA | CGGAGTCAGAAGCAATCCAT   |
| DARS                  | CCTGAGGCAGAAGGAGAAGA | GACTGGAGACGGAAGACTGC   |
| CFDP1                 | GTTCCTTCAGCTCTGCCATC | TGAAGCTCTCCCAGTCCAGT   |
| ASB13                 | GGAGCATCTGGACTGTGTCA | GTGGTGAAGGGCAGTCTCAT   |
| TM9SF4                | CCAGAACGATCCCCTAGAAA | TCTCAGCACCTCTCCCAGAT   |
| NDUFB2                | ACTGCTGGAGATGGTGGAGT | CACATGAGTCCGCTGAAGAA   |
| MYC                   | GCCACGCTCCACACATCAG  | TCTTGGCAGCAGGATAGTCCTT |
| MMP1                  | AGGTCTCTGAGGGTCAAGCA | CTGGTTGAAAAGCATGAGCA   |
| ACLY                  | TGCCGACTACATCTGCAAAG | GGTTCAGCAAGGTCAGCTTC   |
| NEK7                  | TGGATGAGCAATCACAAGGA | TAGCCCATATCCGGTCGTAA   |
| UHMK1                 | TGGCCTGCAGAGTGATACAG | AGCAGAACTGTTTGCCTTCC   |
| Kdm1a mouse           | CGAATGACCTCTCAGGAAGC | CCAGCCATAACTGCAATGTG   |

### Oligonucleotides for ChIP on TSS

|          |                      |                      |
|----------|----------------------|----------------------|
| ONECUT2  | GCCCTGATGGACTGAATGAA | GTGCCAGACTTTCCATTGT  |
| ZNF768   | TTCTTCTCAGGCTTTGGAG  | CAGCAACAGCAAAGCACTTC |
| GRWD1    | GATTAGCGGTCCCAGGAGTT | CTGCTGACACCCGGTAAGAG |
| RPIA     | CGGAGAGCATTATGGGATTG | GGGTCTTGCTGGGAAATGTA |
| RSAD1    | AGTTCTGAGCCAGGCACATC | CCTCCTGTCGGTCTTTCC   |
| ANKRD13B | TCCTCTCTCCCCATCATCC  | GGTCCCCACAGCTGCATA   |
| LEF1     | ACACACCCCAAAACCAAGAC | GAAGGAGGTGGTGATTGAGG |
| TMEM198  | GGGTTGGCAGTGATTGTCTT | TCTGCTCCTGACGTCATCTC |
| BSN      | CAGAGGCCGCTTCTAGTGG  | CGCGGTTGTATCATGCTG   |
| OXNAD1   | TGGAGATGGCTGAACTAGGG | GCGAGCCCCACATTCTATT  |
| ABCF1    | AGGCTTCCCAGACAGTCGTA | GAGCTTCGCCGTCATCTC   |
| SNX12    | TGTGCTGCTAGGCAGGGTAT | GAGTGGAGGCCATATTGAGG |
| ELK3     | GGCGGAAAAGCCTGTTTA   | GAGCAGGAAGTTGGAGCAGT |
| MMP1     | AGGAATCCATAAGGGGAGGA | CGGTGTCACCAGTGCTATCT |

### siRNAs

|                 |                           |                         |
|-----------------|---------------------------|-------------------------|
| ERR $\alpha$ #1 | GGCAGAAACCUAUCUCAGGUU     | CCUGAGAUAGGUUUCUGCCUC   |
| ERR $\alpha$ #2 | GAAUGCACUGGUGUCACAUCUGCUG | CAGCAGAUAGACACCAGUGCUUC |
| LSD1#1          | ACUUUGUAACUGUCGAGCUGC     | GCAGCUCGACAGUUACAAAGU   |
| LSD1#2          | CCACGGAGCGACAGAGCGAGC     | GCUCGCUCUGUCGUCCGUGG    |
| NRF1#1          | CAGUCACUAUGGCGCUUAA       | UUAAGCGCCAUAUGUGACUG    |
| NRF1#2          | CACGUUUGCUUCGAAACU        | AGUUUCCGAAGCAAACGUG     |
